# Supplementary material for: RandoMice, a novel, user-friendly randomization tool in animal research
Source: PubMed Central journal article supplement (PMC7406044; doi:10.1371/journal.pone.0237096), 2020-08-05
Supplement: pone.0237096.s001.pdf [file pone.0237096.s001.pdf]

| <b>Name of experimental unit</b> | <b>Covariate_1</b> | <b>Covariate_2</b> | <b>Covariate_3</b> | <b>Marker</b> |
|----------------------------------|--------------------|--------------------|--------------------|---------------|
| <b>1</b>                         | 6.87               | 17.91              | 0.91               | RRL           |
| <b>2</b>                         | 3.92               | 15.96              | 1.09               | RL            |
| <b>3</b>                         | 5.59               | 15.07              | 1.24               | RL            |
| <b>4</b>                         | 2.28               | 13.49              | 1.42               | LL            |
| <b>5</b>                         | 2.10               | 12.30              | 1.36               | L             |
| <b>6</b>                         | 5.24               | 9.90               | 0.70               | RR            |
| <b>7</b>                         | 5.96               | 14.67              | 1.82               | R             |
| <b>8</b>                         | 2.22               | 16.36              | 1.52               | R             |
| <b>9</b>                         | 5.37               | 14.16              | 0.92               | RLL           |
| <b>10</b>                        | 2.31               | 14.76              | 1.41               | R             |
| <b>11</b>                        | 3.80               | 12.44              | 0.70               | RRL           |
| <b>12</b>                        | 4.53               | 13.67              | 1.66               | L             |
| <b>13</b>                        | 5.55               | 16.88              | 1.13               | LL            |
| <b>14</b>                        | 5.55               | 13.75              | 0.80               | RR            |
| <b>15</b>                        | 6.71               | 16.96              | 1.26               | R             |
| <b>16</b>                        | 2.94               | 14.84              | 1.14               | L             |
