# Supplementary material for: RandoMice, a novel, user-friendly randomization tool in animal research
Source: PubMed Central journal article supplement (PMC7406044; doi:10.1371/journal.pone.0237096), 2020-08-05
Supplement: pone.0237096.s002.pdf [file pone.0237096.s002.pdf]

| <b>Proportion of unique block sets</b> | <b>Lowest ranking value</b> | <b>SD</b> | <b>n</b> | <b>Attempts (proportion of unique block sets)</b> | <b>SD</b> | <b>n</b> |
|----------------------------------------|-----------------------------|-----------|----------|---------------------------------------------------|-----------|----------|
| <b>0.99</b>                            | 0.16                        | 0.0062    | 256      | 4.59                                              | 0.11      | 256      |
| <b>0.50</b>                            | 0.19                        | 0.037     | 256      | 0.69                                              | 0.0070    | 256      |
| <b>0.25</b>                            | 0.23                        | 0.047     | 256      | 0.29                                              | 0.0024    | 256      |
| <b>0.12</b>                            | 0.25                        | 0.050     | 256      | 0.13                                              | 0.0012    | 256      |
| <b>0.062</b>                           | 0.29                        | 0.064     | 256      | 0.064                                             | 0.00057   | 256      |
| <b>0.031</b>                           | 0.34                        | 0.076     | 256      | 0.032                                             | 0.00030   | 256      |
| <b>0.016</b>                           | 0.39                        | 0.085     | 256      | 0.016                                             | 0.00014   | 256      |
| <b>0.0078</b>                          | 0.43                        | 0.11      | 256      | 0.0078                                            | 0.000072  | 256      |
| <b>0.0039</b>                          | 0.53                        | 0.15      | 256      | 0.0039                                            | 0.000032  | 256      |
| <b>0.0019</b>                          | 0.64                        | 0.21      | 256      | 0.0019                                            | 0.000010  | 256      |
| <b>0.00093</b>                         | 0.79                        | 0.25      | 256      | 0.00093                                           | 0.000010  | 256      |
| <b>0.00047</b>                         | 0.98                        | 0.38      | 256      | 0.00047                                           | 0         | 256      |
| <b>0.00016</b>                         | 1.45                        | 0.55      | 256      | 0.00016                                           | 0         | 256      |
